# Supplementary material for: Deletion of the MBII-85 snoRNA Gene Cluster in Mice Results in Postnatal Growth Retardation
Source: PLOS journal article supplement (doi:10.1371/journal.pgen.0030235), 2007-12-26
Supplement: S2 (10.1371/journal.pgen.0030235.s002) [file journal.pgen.0030235.s002]

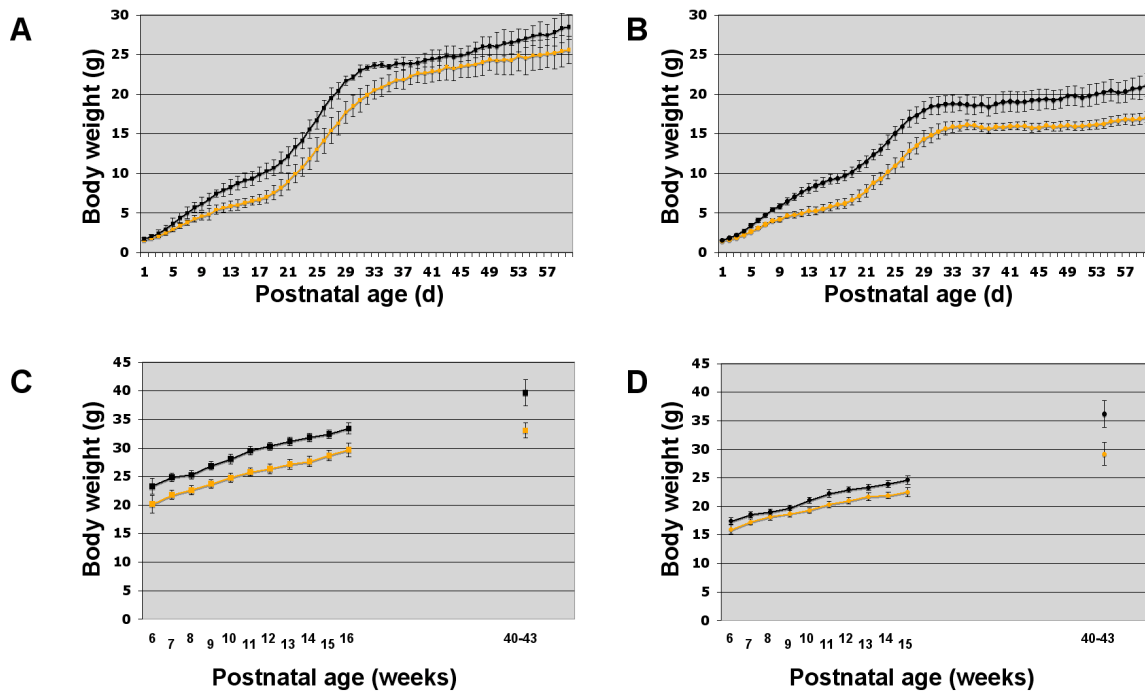

**Figure S2.**

**Growth retardation in *PWSer*<sup>m+/p-</sup> mice in FVB/N and BALB/c genetic crosses.**

**A, B.** Growth dynamics of mice in 126SV x C57BL/6 x FVB/N genetic crosses (~50% FVB/N contribution) beginning at postnatal day 1. **A.** Growth dynamics of 11 investigated males. The yellow line corresponds to the weight gain of 8 *PWSer*<sup>m+/p-</sup> males. The black line corresponds to the weight gain of 3 wild-type males. **B.** Growth dynamics of 21 investigated female mice. The yellow line corresponds to the weight gain of 13 *PWSer*<sup>m+/p-</sup> females. The black line corresponds to the weight gain of 8 wild-type females. **C, D.** Growth dynamics of mice in 126SV x C57BL/6 x BALB/c genetic crosses (~50% BALB/c contribution) beginning at postnatal week 6. **C.** Growth dynamics of 100 analyzed male mice. The yellow line corresponds to weight gain of 47 *PWSer*<sup>m+/p-</sup> males. The black line corresponds to 53 *PWSer*<sup>m+/p+</sup> males. **D.** Growth dynamics of 102 female mice. The yellow line corresponds to the weight gain of 51 *PWSer*<sup>m+/p-</sup> females. The black line corresponds to the weight gain of 51 *PWSer*<sup>m+/p+</sup> females. In all cases, black error bars exhibit statistically significant intervals (confidence level 95%, p=0.05).
